# Supplementary material
Source: PubMed Central journal article supplement (PMC2930815)
Supplement: NIHMS216133-supplement-02.pdf [file NIHMS216133-supplement-02.pdf]

**Table S1: Individual Pro-Neurogenic Compounds Isolated From Pools**

| Pool | Molecule                                |
|------|-----------------------------------------|
| 7    | $C_{21}H_{18}Br_2N_2O$ (MW = 474.19)    |
| 14   | None Found                              |
| 18   | $C_{21}H_{18}F_3N_3OS$ (MW = 417.45)    |
| 19   | $C_{16}H_{19}N_5O_2S_2$ (MW = 377.49)   |
| 41   | $C_{15}H_{18}N_4O_4S$ (MW = 350.40)     |
| 53   | $C_{14}H_{18}IN_5O_2$ (MW=415.23)       |
| 54   | $C_{11}H_{14}BrN_3O_2S_2$ (MW = 364.29) |
| 61   | $C_{21}H_{22}N_4O_5$ (MW = 410.43)      |
| 69   | None Found                              |
| 70   | $C_{20}H_{18}ClFN_6O$ (MW = 412.85)     |

Individual pro-neurogenic compounds and molecular weight (MW) are listed across from the original pool from which they were isolated.
